# Investigating spatial variability in COVID-19 pandemic severity across 19 geographic areas, Spain, 2020

**Running title:** death risk of COVID-19 in Spain

**Authors:**

Sushma Dahal\*, Kenji Mizumoto\* Gerardo Chowell

\*Joint first authors

**Affiliations:**

Department of Population Health Sciences, School of Public Health, Georgia State

University, Atlanta, Georgia, USA (S. Dahal, G. Chowell)

Graduate School of Advanced Integrated Studies in Human Survivability, Kyoto University

Yoshida-Nakaadachi-cho, Sakyo-ku, Kyoto, Japan (K. Mizumoto)

Hakubi Center for Advanced Research, Kyoto University, Yoshidahonmachi, Sakyo-ku,

Kyoto, Japan (K. Mizumoto)

**Article type:**

Major Article

**Word count:**

Abstract: 200 (Max 200)

Main: 2883 (Max 3500)

## **Abstract**

**Background:** Spain has been disproportionately affected by the COVID-19 pandemic with the second highest death toll in the world after Italy. Here we analyzed estimates of pandemic severity and investigated how different factors shaped the severity of the COVID-19 pandemic.

**Methods:** We retrieved the daily cumulative numbers of laboratory-confirmed COVID-19 cases and deaths in Spain from February 20, 2020 to April 2, 2020. We used statistical methods to estimate the time-delay adjusted case fatality ratio (CFR) for 17 autonomous areas and 2 autonomous cities of Spain. We then assessed how transmission and sociodemographic variables were associated with the CFR across areas in Spain using multivariate regression analysis.

**Results:** We estimated the highest time-delay-adjusted CFR for Madrid (38.4%) and the average adjusted CFR in Spain at 23.9%. Our multivariate regression analysis revealed a statistically significant three predictor variables: infant mortality rate, poverty risk rate and the cumulative morbidity rate.

**Conclusions:**

Our estimates of the time-delay adjusted CFR for 12 autonomous areas/cities in Spain are significantly higher than those previously estimated for other geographic regions including China and Korea. Our results call for urgent public health interventions focusing on low socioeconomic groups to ameliorate the burden of the COVID-19 pandemic in Spain.

Key words: COVID-19, Spain, time-delay adjusted CFR, 2020

## **Background**

Since the emergence of COVID-19 in Wuhan, China in December 2019, the novel coronavirus (SARS-CoV-2) continues to spread throughout the world, straining and overloading healthcare systems and causing substantial morbidity and mortality burden during a short time period [1].

As of April 11 2020, 1,610,909 confirmed cases including 99,690 deaths attributed to COVID-19 have been reported from 212 countries/territories/areas [1]. While the number of COVID-19 cases and deaths in China have been on a downward trend since late February 2020, the number of new reported cases soared in new hotspots in the US, Spain, Italy, France, the UK, and Iran. Thus far, Spain has reported the second highest death toll after Italy and second highest number of confirmed COVID-19 cases after the United States.

The case fatality ratio is a useful metric to assess pandemic severity, which is typically estimated as the proportion of deaths among the total number of cases attributed to the disease [2]. However, during the course of outbreak of an infectious disease outbreak such as COVID-19, real-time estimates of CFR need to be derived carefully since it is prone to ascertainment bias and right censoring [2, 3]. In particular, the disease spectrum for COVID-19 ranges from asymptomatic and mild infections to severe cases that require hospitalization and specialized supportive care. This may lead to overestimation of the CFR among ascertained cases. On the other hand, there is a delay from illness onset to death for severe cases [4], which could lead to an underestimation of the CFR [3, 5]. Therefore, statistical methods that help mitigate inherent biases in estimates of the CFR should be employed to accurately plan for medical resources such as ICU units and ventilators, which are essential resources to save the lives of critically ill patients [6-8].

Several studies have reported CFR estimates for COVID-19 [9-11]. Overall, these estimates have varied substantially across geographic regions even within the same country. For example, a recent study estimated the time-delay-adjusted CFR at 12.2% for the ground zero of the COVID-19 pandemic: the city of Wuhan [4], whereas for the most affected region in Italy (Northwest), the delay-adjusted CFR reached 23.0% [12]. The drivers behind the geographical variations in the severity of the COVID-19 pandemic are yet to be investigated, but could

provide critical information to mitigate the morbidity and mortality impact of this and future pandemics [13].

In this study we aim to estimate the severity of COVID-19 pandemic across 19 geographic areas in Spain and aim to explain how these estimates varied geographically as a function of underlying factors. For the real-time estimation of severity, we adjust for right censoring using established methods [14, 15] and report the estimates of the time-delay adjusted CFR of COVID-19 for 17 autonomous areas and 2 autonomous cities of Spain as well as for the entire Spain. We then assessed the association between different transmission and socio-demographic factors and the estimated CFRs across areas using multivariate regression analyses.

## **Methods**

**Study setting:** Spain is situated on the Iberian Peninsula and is divided into 17 autonomous communities (CCAA) and 2 African autonomous cities [16]. Ceuta and Melilla are the 2 African autonomous cities whereas the 17 CCAA include: Andalucía, Aragon, Asturias, Balears, Canarias, Cantabria, Castilla-La Mancha, Castilla y Leon, Catalunya, C. Valenciana, Extremadura, Galicia, Madrid, Murcia, Navarra, Pais Vasco, La Rioja [16].

**Initial cases of COVID-19 in Spain:** The first case of COVID-19 in Spain was confirmed on 31st January, 2020 in La Gomera, Canary Islands in a person who was in contact with an infected person while in Germany [17]. By February 27, there were total 12 cases which increased to 45 cases in March 1 and then continued to rise rapidly throughout the country [18].

### **Data Sources:**

The Ministry of Health of Spain releases daily report on COVID-19 cases and deaths [19]. From these reports we retrieved the daily cumulative numbers of reported laboratory-confirmed COVID-19 cases and deaths from February 20, 2020 to April 2, 2020. We then stratified the data into 20 groups that included 17 CCAA, 2 African autonomous cities and for the entire Spain.

For each CCAA we obtained data on total population size, proportion of the population older than 60 years, proportion of population at risk of poverty, and infant mortality rates from the

Statistics National Institute (Instituto Nacional de Estadística) [20]. We also obtained the data on the total area of each CCAA [21], and percentage of total consolidated expenditure on hospital and specialized services in the CCAA from the annual report issued by the national health system, 2018 [22]. Finally, we also included two transmission-related metrics: the COVID-19 initial growth rate during the 15 days of local transmission and the cumulative morbidity rate given by the cumulative number cases divided by the local population size. Additionally we obtained the shapefiles of the autonomous areas of Spain from the national geographic information system of Spain [23].

### **Time-delay adjusted CFR estimation**

The crude CFR is defined as the number of cumulative deaths divided by the number of cumulative cases at a specific point in time. For the estimation of CFR in real time, we employed the delay from hospitalization to death,  $h_s$ , which is assumed to be given by  $h_s = H(s) - H(s-1)$  for  $s > 0$  where  $H(s)$  is a cumulative density function of the delay from hospitalization to death and follows a gamma distribution with mean 10.1 days and SD 5.4 days, obtained from the previously published paper [4]. Let  $\pi_{a,t_i}$  be the time-delay adjusted case fatality ratio on reported day  $t_i$  in area  $a$ , the likelihood function of the estimate  $\pi_{a,t_i}$  is

$$L(\pi_{a,t_i}; c_{a,t}) = \prod_{t_i} \binom{\sum_{t=1}^{t_i} c_{a,t}}{D_{a,t_i}} \left( \pi_{a,t_i} \frac{\sum_{t=2}^{t_i} \sum_{s=1}^{t-1} c_{a,t-s} h_s}{\sum_{t=1}^{t_i} c_{a,t}} \right)^{D_{a,t_i}} \left( 1 - \pi_{a,t_i} \frac{\sum_{t=2}^{t_i} \sum_{s=1}^{t-1} c_{a,t-s} h_s}{\sum_{t=1}^{t_i} c_{a,t}} \right)^{\sum_{t=1}^{t_i} c_{a,t} - D_{a,t_i}}$$

where  $c_{a,t}$  represents the number of new cases with reported day  $t$  in area  $a$ , and  $D_{a,t_i}$  is the cumulative number of deaths until reported day  $t_i$  in area  $a$  [14, 15]. Among the cumulative cases with reported day  $t$  in area  $a$ ,  $D_{a,t_i}$  have died and the remainder have survived the infection. The contribution of those who have died with biased death risk is shown in the middle parenthetical term and the contribution of survivors is presented in the right parenthetical term. We assume that  $D_{a,t_i}$  is the result of the binomial sampling process with probability  $\pi_{a,t_i}$ .

We estimated model parameters using a Monte Carlo Markov Chain (MCMC) method in a Bayesian framework. Posterior distributions of the model parameters were estimated by sampling from the three Markov chains. For each chain, we drew 100,000 samples from the posterior distribution after a burn-in of 20,000 iterations. Convergence of MCMC chains were evaluated using the potential scale reduction statistic [24, 25]. Estimates and 95% credibility intervals for these estimates are based on the posterior probability distribution of each parameter and based on the samples drawn from the posterior distributions.



## **Multivariate regression analysis**

We also explored the association between time-delay-adjusted CFR with population size, population density, proportion of population aged more than 60 years, infant mortality rate, population at risk of poverty as measured by poverty risk rate, consolidated public health expenditure on hospital and specialized services as well as with two transmission-related metrics: the cumulative morbidity rate of COVID-19 and the initial incidence growth rate across CCAAs. For this analysis, we built a multivariate linear regression model with all predictor variables to identify simplified models with significant factors linked to the variation in CFR estimates across geographic areas in Spain. We used stepwise regression method to build a final model that contained significant predictors.

All statistical analyses were conducted in R version 3.6.1 (R Foundation for Statistical Computing, Vienna, Austria).

## **Results:**

As of April 2, a total of 117,710 cases and 10,935 deaths due to COVID-19 have been reported in Spain. Moreover, the Madrid region has reported the highest number of cases at 34,188 (29%) and deaths at 4,483 (41%) followed by Catalunya with 23460 cases (19.9%) and 2335 deaths (21.3%).

Figure 1 displays the observed and posterior estimates of crude case fatality ratio in (A) Spain (National), (B) Andalucia(AN), (C) Aragon(AR), (D) Asturias(AS), (E) Balears(IB), (F) Canarias(CN), (G) Cantabria(CB), (H) Castilla-La Mancha(CM), (I) Castilla y Leon(CL), (J) Catalunya(CT), (K) Ceuta(CE), (L) C.Valenciana(VC), (M) Extremadura(EX), (N) Galicia(GA), (O) Madrid(MD), (P) Melilla(ME), (Q) Murcia(MC), (R) Navarra(NC), (S) Pais Vasco(PV), and (T) La Rioja(RI). Day 1 corresponds to March 1st in 2020. Black dots show the crude case fatality ratio, and light and dark indicate 95% and 50% credible intervals for posterior estimates, respectively. Our model-based crude CFR fitted the observed data well in all the regions except Aragon where the model did not fit well for first 2 weeks. There was a rapid rise in crude CFR in the Madrid, Castilla-La Mancha, and Catalunya, and also for the overall Spain.

Figure 2 illustrates observed and model based posterior estimates of time-delay-adjusted CFR in the 20 areas. Black dots show crude case fatality ratios, and light and dark indicate 95% and 50% credible intervals for posterior estimates, respectively. Our posterior estimates of time-delay adjusted CFR are higher than the crude observed CFR for AR, CM, CL, CT, VC, MD, EX, PV, and at the national level. For AN, AS, CN, CB, CE, GA, ME, MC, and NC the time-delay-adjusted CFR are slightly higher than the crude CFR. Similarly, for IB the model-based estimates fit very well with the crude estimate. The graph of the time-delay

adjusted CFR varies considerably for different areas. For instance, as the epidemic progresses, the adjusted CFR increases slightly in CN and NC while it shows the upward trend for first two weeks and then declines very slowly as in MD. Similarly, for AR the graph shows the downward trend, probably due to misdiagnosis of cases until the first reports of deaths. Likewise, for CM the graph shows upward trend for first two weeks, followed by a relative decline and then again moves upwards and then stays stable.

A summary of the time delay adjusted case fatality ratio, range of median estimates and crude CFR of COVID-19 across different areas of Spain are presented in Table 1. The Madrid autonomous area had the highest time delay adjusted CFR of 38.4% [95% credible interval: 38.0-38.8%] followed by Castilla-La Mancha (38.2%) [95%CrI: 37.3-39.1%], Catalunya (28.9%) [95%CrI: 28.4-29.4%], and Castilla y Leon (27.9%) (95%CrI: 27.1-28.8%). The national estimate for Spain was 23.9% (95%CrI: 23.5-24.4%). Of the 19 autonomous areas and cities of Spain, 17 had the time-delay adjusted CFR greater than 10% (Table 1, figure 3).

Autonomous areas with higher proportion of population at risk of poverty, areas with a higher infant mortality rate and areas with higher cumulative morbidity rate experienced higher CFRs. These three significant factors explained 62.2% (62.2 is multiple R-squared and adjusted R-squared is 53.5%) of variance in the pandemic severity across CCAAs ( $P < 0.05$ ,

Table 2). Figure 4 demonstrates the model-adjusted CFR, infant mortality rate, cumulative morbidity rate and poverty risk rate within the map of Spain for 17 CCAAs.

## **Discussion**

In this paper, we have estimated the time delay adjusted case fatality ratio of COVID-19 for 19 autonomous areas/cities of Spain. Our latest estimate of time-delay adjusted CFR in Spain was at 23.9%, but it varied widely across the 19 Spanish areas, with some areas exhibiting higher CFR values such as in Madrid (38.4%), and Castilla-La Mancha (38.2%) while other areas such as Melilla (3.9%), Galicia (8.2%) and Murcia (8.3%) experiencing relatively lower CFR values. We also observed a significant positive association of the time-delay adjusted CFR estimates across 17 Spanish areas with two socio-demographic factors: infant mortality rate, and poverty risk rate while cumulative morbidity rate was also positively associated with CFR. Our findings suggest the need for additional control efforts and medical resources particularly for lower socio-economic areas which have been particularly hit hard by the COVID-19 pandemic.

The adjusted CFR estimates in Spain is higher than the estimates for Wuhan (12.2%)[4], Korea (1.4%) [26] and slightly less than the estimates for Northwest Italy (31.4%)[12]. However when we compare the estimates for the most affected areas across different countries, the rate

in Madrid, Spain is higher than that estimated for Wuhan in China (12.2%) [4], Daegu in Korea (2.4%) [26] and Northwest, Italy (23.0%) [12]. This difference across countries and regions may be partly explained by differences in population age structure, density, other socio-demographic factors, and the scale of the pandemic in different areas. The median age in Spain (44.9 years) [27] is comparable to that of Italy (45.4 years) but higher than that for China (36.7 years) [28]. Indeed, the elderly population is at risk of severe outcomes from COVID-19 [29-31], which could partly explain the higher severity observed for Italy and Spain. Other factors that could have played a role in these differences may be related to differences in the definition of COVID-19 death, and differences in testing strategies. For example, in Korea extensive testing and rigorous contact tracing strategy were implemented [32] while testing prioritized more severe cases in Italy [31] and Spain [33].

We found a significant positive association between CFR and the infant mortality rate, the poverty risk rate and the COVID-19 cumulative morbidity rate across areas in Spain. In fact, these three variables explained more than 50% of the geographic variation in CFR. Infant mortality rate is an important indicator of an overall health of society while poverty risk rate reflects the socio-economic status of an area. In any pandemic situation like COVID-19, the poorer tend to exhibit the highest morbidity and mortality rates. For instance, lower

socioeconomic groups were also disproportionately affected by the 1918 influenza pandemic [34, 35].

Those with the poor economic status have higher odds of having pre-existing conditions such as cardiovascular diseases, obesity, diabetes, and cancer [36-38]. According to WHO-China-joint mission on COVID-19, the patients with no comorbid conditions had a crude CFR of 1.4% compared to very higher rates among those with preexisting conditions. For example, 13.2% for those with cardiovascular disease, 9.2% for diabetes, 8.4% for hypertension, 8.0% for chronic respiratory disease, and 7.6% for cancer [10]. Moreover, preliminary COVID-19 mortality data from the US also indicates a 2-fold age-adjusted death rate among Hispanic/Latino and 1.9-fold among Black/African American compared to Whites [39].

In our study we saw considerable variations in CFR trend across areas. For instance, as the epidemic progressed, the adjusted CFR showed a slightly upward trend in CN and NC, a rapid upward trend followed by the slow decline in MD, and a downward trend in AR. Likewise, for CM the graph showed an upward trend followed by a relative decline and then again an upward trend before staying stable. The CFR trend for the 19 autonomous areas can be helpful in the planning and implementation of health care services and prevention measures separately for

each of them. The downward trend in CFR as seen in some of the areas in our study suggest the improvement in epidemiologic surveillance leading to the increased capture of mild or asymptomatic cases. A higher number of mild and asymptomatic cases also indicate an increase in human-to-human transmission leading to a prolonged epidemic which can be controlled through effective social distancing measures until an effective vaccine or treatment becomes available [4].

The upward trend in CFR indicates that the temporal disease burden exceeded the capacity of healthcare facilities and the surveillance system probably missed many cases during the early phase of the epidemic [4], particularly due to a significant presence of mild and asymptomatic cases. It has been found that about 18% of the COVID-19 infections in Diamond Princess Cruise ship were asymptomatic [40]. The increasing trend in CFR could further be explained the nosocomial transmission affecting the health care workers, inpatients and their visitors [4]. In China, of 44672 confirmed COVID-19 cases, 3.8% was among the health care personnel [41]. Similarly, Wang et al. in their study suspected 41% of the patients to have human-to-human hospital associated transmission of COVID-19 [42].

Our study has some limitations. The preferential ascertainment of severe cases bias in COVID-19 may have spuriously increased our estimate of CFR [3], which is a frequent caveat

in this type of studies [43, 44]. Similarly, given the long infection-death time for COVID-19 which ranges between 2 to 8 weeks [29], our estimate may have been affected by delayed reporting bias [3, 5]. Similarly, in our data, the date of report reflects the date of reporting and not the date of onset of illness. Finally, we assumed infant mortality and poverty risk rate as a proxy for areas with low socio-economic groups.

## **Conclusion**

The risk of death due to COVID-19 in Spain was estimated at 23.9%, but estimates varied substantially across 19 geographic areas. The CFR was as high as 38% in Madrid (38.4%), and Castilla-La Mancha areas and as low as 4% in Melilla and 8% in Galicia and Murcia. Of the 19 autonomous areas/cities, 16 had a time-delay-adjusted CFR greater than 10% reflecting a disproportionate severity burden of COVID-19 in Spain. Importantly, our estimate of CFR for the most affected Madrid region is higher than previous estimates for the most affected areas within China, Korea, and Italy. Our findings suggest a significant association of factors such as infant mortality rate and poverty risk rate with the increased risk of death due to COVID-19. Further studies with patient level data on mortality, and risk factors could provide a more detailed understanding of the factors shaping the risk of death related to COVID-19.

## **Note**



## **Financial support.**

KM acknowledges support from the Japan Society for the Promotion of Science (JSPS)

KAKENHI Grant Number 15K20936, and from the Leading Initiative for Excellent Young

Researchers from the Ministry of Education, Culture, Sport, Science & Technology of Japan.

GC acknowledges support from NSF grant 1414374 as part of the joint NSF-NIH-USDA

Ecology and Evolution of Infectious Diseases program; UK Biotechnology and Biological

Sciences Research Council grant BB/M008894/1.

## **Potential conflicts of interest.**

No conflict.

**Address for correspondence:** K Mizumoto, Graduate School of Advanced Integrated

Studies in Human Survivability, Kyoto University Yoshida-Nakaadachi-cho, Sakyo-ku,

Kyoto, Japan, Tel: +81 75 762 2001 Fax: +81 75 762 2277, E-mail:

mizumoto.kenji.5a@kyoto-u.ac.jp

## **References**

1. WHO, Coronavirus disease 2019 (COVID-19)-Situation report-82. 11 April 2020.

2. Mizumoto, K., et al., Estimating the risk of Middle East respiratory syndrome (MERS) death during the course of the outbreak in the Republic of Korea, 2015. *International Journal of Infectious Diseases*, **2015**. 39: p. 7-9.
3. Lipsitch, M., et al., Potential biases in estimating absolute and relative case-fatality risks during outbreaks. *PLoS neglected tropical diseases*, **2015**. 9(7).
4. Mizumoto, K. and G. Chowell, Estimating Risk for Death from 2019 Novel Coronavirus Disease, China, January-February 2020. *Emerging infectious diseases*, **2020**. 26(6).
5. Kucharski, A.J. and W.J. Edmunds, Case fatality rate for Ebola virus disease in west Africa. *The Lancet*, **2014**. 384(9950): p. 1260.
6. Lipsitch, M., D.L. Swerdlow, and L. Finelli, Defining the epidemiology of Covid-19—studies needed. *New England Journal of Medicine*, **2020**.
7. Reich, N.G., et al., Estimating absolute and relative case fatality ratios from infectious disease surveillance data. *Biometrics*, **2012**. 68(2): p. 598-606.
8. Wu, J.T., et al., Estimating clinical severity of COVID-19 from the transmission dynamics in Wuhan, China. *Nature Medicine*, **2020**.
9. Novel, C.P.E.R.E., The epidemiological characteristics of an outbreak of 2019 novel coronavirus diseases (COVID-19) in China. *Zhonghua liu xing bing xue za zhi= Zhonghua liuxingbingxue zazhi*, **2020**. 41(2): p. 145.

10. WHO, Report of the WHO-China Joint Mission on Coronavirus Disease 2019 (COVID-19). **2020**, February.
11. Rodriguez-Morales, A.J., et al., Clinical, laboratory and imaging features of COVID-19: A systematic review and meta-analysis. *Travel Medicine and Infectious Disease*, **2020**: p. 101623.
12. Mizumoto, K., S. Dahal, and G. Chowell, Spatial variability in the risk of death from COVID-19 in Italy, **2020**. March 2020.
13. Chowell, G., et al., Spatial-temporal excess mortality patterns of the 1918–1919 influenza pandemic in Spain. *BMC infectious diseases*, **2014**. 14(1): p. 371.
14. Nishiura, H., et al., Early epidemiological assessment of the virulence of emerging infectious diseases: a case study of an influenza pandemic. *PLoS One*, **2009**. 4(8).
15. Tsuzuki, S., et al., Dynamics of the pneumonic plague epidemic in Madagascar, August to October 2017. *Eurosurveillance*, **2017**. 22(46).
16. NSD. Spain-Administrative division 4/6/2020]; Available from: [https://nsd.no/european\\_election\\_database/country/spain/administrative\\_divisions.htm](https://nsd.no/european_election_database/country/spain/administrative_divisions.htm)
17. Chavez, N. First case of coronavirus confirmed in Spain. January 31, **2020** [3/31/2020].
18. WHO, Coronavirus disease 2019 (COVID-19): Situation reports 38, and 41. 2020.

19. Spain, M.o.H. Situation of COVID-19 in Spain **2020**; Available from:  
<https://covid19.isciii.es/>
20. INE. Resident population by date, sex and age. **2020**; Available from:  
[https://www.ine.es/dyngs/INEbase/es/operacion.htm?c=Estadistica\\_C&cid=1254736176951&menu=ultiDatos&idp=1254735572981](https://www.ine.es/dyngs/INEbase/es/operacion.htm?c=Estadistica_C&cid=1254736176951&menu=ultiDatos&idp=1254735572981)
21. Sawe, B.E. The Autonomous Communities Of Spain. Sept. 28, 2017; Available from:  
[worldatlas.com/articles/the-autonomous-communities-of-spain.html](http://worldatlas.com/articles/the-autonomous-communities-of-spain.html) .
22. Informe anual del sistema nacional de salud, 2018 MINISTERIO DE SANIDAD,  
CONSUMO Y BIENESTAR SOCIAL.
23. Geographical reference information 04/13/2020]; Available from:  
<http://centrodedescargas.cnig.es/CentroDescargas/equipamiento.do?method=mostrarEquipamiento>
24. Gamerman, D. and H.F. Lopes, Markov chain Monte Carlo: stochastic simulation for Bayesian inference. **2006**: CRC Press.
25. Gelman, A. and D.B. Rubin, Inference from iterative simulation using multiple sequences. *Statistical science*, **1992**. 7(4): p. 457-472.
26. Shim Eunha, et al., Estimating the risk of COVID-19 death during the course of the outbreak in Korea, February- March, 2020 **2020**.
27. Worldometer, Spain population. **2020**.

28. World Population Prospects 2019, Online Edition. Rev. 1. **2019**, United Nations, Department of Economic and Social Affairs, Population Division.
29. Organization, W.H., Report of the WHO-China Joint Mission on Coronavirus Disease 2019 (COVID-19). **2020**, February.
30. Surveillances, V., The Epidemiological Characteristics of an Outbreak of 2019 Novel Coronavirus Diseases (COVID-19)—China, 2020. *China CDC Weekly*, **2020**. 2(8): p. 113-122.
31. Onder, G., G. Rezza, and S. Brusaferro, Case-Fatality Rate and Characteristics of Patients Dying in Relation to COVID-19 in Italy. *JAMA*, **2020**.
32. Colbourn, T., COVID-19: extending or relaxing distancing control measures. *The Lancet Public Health*, **2020**.
33. Linde, P., Spain's coronavirus crisis: Why the numbers are failing to show the full picture, in El Pais. April 5, **2020**.
34. Dahal, S., et al., Natality decline and spatial variation in excess death rates during the 1918–1920 influenza pandemic in Arizona, United States. *American journal of epidemiology*, **2018**. 187(12): p. 2577-2584.
35. Mamelund, S.E., 1918 pandemic morbidity: The first wave hits the poor, the second wave hits the rich. *Influenza and other respiratory viruses*, **2018**. 12(3): p. 307-313.

36. Everson, S.A., et al., Epidemiologic evidence for the relation between socioeconomic status and depression, obesity, and diabetes. *Journal of psychosomatic research*, **2002**. 53(4): p. 891-895.
37. Clark, A.M., et al., Socioeconomic status and cardiovascular disease: risks and implications for care. *Nature Reviews Cardiology*, **2009**. 6(11): p. 712.
38. Clegg, L.X., et al., Impact of socioeconomic status on cancer incidence and stage at diagnosis: selected findings from the surveillance, epidemiology, and end results: National Longitudinal Mortality Study. *Cancer causes & control*, **2009**. 20(4): p. 417-435.
39. Age adjusted fatal lab confirmed COVID-19 cases per 100,000 by race/ethnicity group. April 6, **2020**.
40. Mizumoto, K., et al., Estimating the asymptomatic proportion of coronavirus disease 2019 (COVID-19) cases on board the Diamond Princess cruise ship, Yokohama, Japan, 2020. *Eurosurveillance*, **2020**. 25(10).
41. Wu, Z. and J.M. McGoogan, Characteristics of and important lessons from the coronavirus disease 2019 (COVID-19) outbreak in China: summary of a report of 72 314 cases from the Chinese Center for Disease Control and Prevention. *Jama*, **2020**.
42. Wang, D., et al., Clinical characteristics of 138 hospitalized patients with 2019 novel coronavirus–infected pneumonia in Wuhan, China. *Jama*, **2020**.

43. Yu, H., et al., Human infection with avian influenza A H7N9 virus: an assessment of clinical severity. *The Lancet*, **2013**. 382(9887): p. 138-145.
44. Cauchemez, S., et al., Middle East respiratory syndrome coronavirus: quantification of the extent of the epidemic, surveillance biases, and transmissibility. *The Lancet infectious diseases*, **2014**. 14(1): p. 50-56.

Table 1. Summary results of time-delay adjusted case fatality ratio of COVID-19 in the two areas in Spain, 2020

(As of Apr 2, 2020)

| Area             | Latest estimate                          | Range of median estimates<br>during the study period | Crude CFR                                            |
|------------------|------------------------------------------|------------------------------------------------------|------------------------------------------------------|
| Spain (National) | 23.9% (95%CrI <sup>§</sup> : 23.5-24.4%) | 23.9-39.9%                                           | 9.1% (95%CrI <sup>†</sup> :9.3-9.5%)<br>10935/117710 |
| Andalucia(AN)    | 14.6% (95%CrI: 14.0-15.2%)               | 2.5-16.0%                                            | 4.0% (95%CrI: 3.9-4.2%)<br>2614/64604                |
| Aragon(AR)       | 23.9% (95%CrI: 22.6-25.2%)               | 23.9-94.8%                                           | 6.0% (95%CrI: 5.7-6.3%)<br>1401/23378                |
| Asturias(AS)     | 10.6% (95%CrI: 9.6-11.6%)                | 5.3-19.4%                                            | 3.4% (95%CrI: 3.1-3.7%)<br>518/15111                 |

|                        |                             |            |                          |
|------------------------|-----------------------------|------------|--------------------------|
|                        |                             |            | 3.4 (95% CrI: 3.1-3.7%)  |
| Balears(IB)            | 12.1% (95% CrI: 10.9-13.4%) | 7.5-12.7%  | 398/11769                |
|                        |                             |            | 3.5 (95% CrI: 3.2-3.8%)  |
| Canarias(CN)           | 11.7% (95% CrI: 10.7-12.8%) | 2.2-11.7%  | 503/14512                |
|                        |                             |            | 3.1% (95% CrI: 2.8-3.4%) |
| Cantabria(CB)          | 12.3% (95% CrI: 10.9-13.6%) | 1.8-12.9%  | 367/11940                |
|                        |                             |            | 9.6% (95% CrI: 9.4-9.8%) |
| Castilla-La Mancha(CM) | 38.2% (95% CrI: 37.3-39.1%) | 5.9-41.3%  | 6532/68044               |
|                        |                             |            | 7.0% (95% CrI: 6.9-7.2%) |
| Castilla y Leon(CL)    | 27.9% (95% CrI: 27.1-28.8%) | 3.0-32.9%  | 4702/66755               |
|                        |                             |            | 7.4% (95% CrI: 7.3-7.6%) |
| Catalunya(CT)          | 28.9% (95% CrI: 28.4-29.4%) | 10.0-31.0% | 14803/199112             |
|                        |                             |            | 2.1% (95% CrI: 0.8-4.3%) |
| Ceuta(CE)              | 15.4% (95% CrI: 6.8-30.0%)  | 14.5-18.1% | 7/333                    |
|                        |                             |            | 5.8% (95% CrI: 5.6-6.0%) |
| C.Valenciana(VC)       | 21.5% (95% CrI: 20.7-22.3%) | 4.4-25.2%  | 3446/59437               |
|                        |                             |            | 7.0% (95% CrI: 6.6-7.4%) |
| Extremadura(EX)        | 26.6% (95% CrI: 25.0-28.1%) | 10.9-28.1% | 1232/17541               |
|                        |                             |            | 8.2% (95% CrI: 7.6-8.8%) |
| Galicia(GA)            | 8.2% (95% CrI: 7.6-8.8%)    | 8.2-12.9%  | 2.0% (95% CrI: 1.8-2.1%) |



|                |                             |            |                             |
|----------------|-----------------------------|------------|-----------------------------|
|                |                             |            | 798/40748                   |
|                |                             |            | 11.9% (95% CrI: 11.8-12.0%) |
| Madrid(MD)     | 38.4% (95% CrI: 38.0-38.8%) | 21.1-53.0% | 38895/326003                |
|                |                             |            | 1.4% (95% CrI: 0.7-2.5%)    |
| Melilla(ME)    | 3.9% (95% CrI: 1.7-7.1%)    | 2.8-4.3%   | 10/722                      |
|                |                             |            | 2.4% (95% CrI: 2.1-2.7%)    |
| Murcia(MC)     | 8.3% (95% CrI: 7.3-9.5%)    | 1.3-8.3%   | 256/10781                   |
|                |                             |            | 3.9% (95% CrI: 3.6-4.1%)    |
| Navarra(NC)    | 13.1% (95% CrI: 12.3-14.0%) | 3.4-13.1%  | 1024/26533                  |
|                |                             |            | 4.9% (95% CrI: 4.8-5.1%)    |
| Pais Vasco(PV) | 16.9% (95% CrI: 16.4-17.5%) | 16.9-41.1% | 3633/73751                  |
|                |                             |            | 3.8% (95% CrI: 3.5-4.0%)    |
| La Rioja(RI)   | 11.0% (95% CrI: 10.3-11.8%) | 5.5-14.8%  | 849/22427                   |

---

<sup>§</sup>CrI: 95% credibility intervals (CrI), <sup>¶</sup>95%CI: 95% confidence interval

Table 2. Final multivariate regression model of time-delay-adjusted CFR as a function of socio-demographic

variables across autonomous areas of Spain

| Predictor                 | Coefficient | Standard error | p-value | Intercept |
|---------------------------|-------------|----------------|---------|-----------|
| Infant mortality rate     | 0.979       | 0.437          | 0.043   | 2.239     |
| Poverty risk rate         | 0.781       | 0.248          | 0.007   |           |
| Cumulative morbidity rate | 0.892       | 0.195          | 0.0005  |           |

## Figure legend

### **Fig 1: Temporal variation of risk of death caused by COVID-19 by area, Spain, March-April,**

#### **2020: crude case fatality rate (cCFR)**

Observed and posterior estimates of crude case fatality ratio in (A) Spain (National), (B) Andalucia(AN),(C)

Aragon(AR), (D) Asturias(AS),(E) Balears(IB),(F) Canarias(CN),(G) Cantabria(CB),(H) Castilla-La

Mancha(CM),(I) Castilla y Leon(CL), (J) Catalunya(CT),(K) Ceuta(CE),(L) C.Valenciana(VC),(M)

Extremadura(EX),(N) Galicia(GA),(O) Madrid(MD),(P) Melilla(ME),(Q) Murcia(MC),(R) Navarra(NC),(S)

Pais Vasco(PV), and (T) La Rioja(RI). Day 1 corresponds to March 1<sup>st</sup> in 2020. Black dots shows crude case

fatality ratio, and light and dark indicates 95% and 50% credible intervals for posterior estimates, respectively.

### **Fig 2: Temporal variation of risk of death caused by COVID-19 by area, Spain, March-April,**

#### **2020: time-delay adjusted case fatality rate**

Observed and posterior estimates of time-delay adjusted case fatality ratio in in (A) Spain (National), (B)

Andalucia(AN),(C) Aragon(AR), (D) Asturias(AS),(E) Balears(IB),(F) Canarias(CN),(G) Cantabria(CB),(H)

Castilla-La Mancha(CM),(I) Castilla y Leon(CL), (J) Catalunya(CT),(K) Ceuta(CE),(L) C.Valenciana(VC),(M)

Extremadura(EX),(N) Galicia(GA),(O) Madrid(MD),(P) Melilla(ME),(Q) Murcia(MC),(R) Navarra(NC),(S)

Pais Vasco(PV), and (T) La Rioja(RI). Day 1 corresponds to March 1<sup>st</sup> in 2020. Black dots shows crude case

fatality ratio, and light and dark indicates 95% and 50% credible intervals for posterior estimates, respectively.

**Figure 3. Latest estimates of time-delay adjusted risk of death caused by COVID-19 by area, 2020, Spain.**

Distribution of time-delay adjusted case fatality risks derived from the latest estimates (April 2, 2020) are presented. Top to bottom: (A) Spain (National), (B) Andalucia(AN), (C) Aragon(AR), (D) Asturias(AS), (E) Balears(IB), (F) Canarias(CN), (G) Cantabria(CB), (H) Castilla-La Mancha(CM), (I) Castilla y Leon(CL), (J) Catalunya(CT), (K) Ceuta(CE), (L) C.Valenciana(VC), (M) Extremadura(EX), (N) Galicia(GA), (O) Madrid(MD), (P) Melilla(ME), (Q) Murcia(MC), (R) Navarra(NC), (S) Pais Vasco(PV), and (T) La Rioja(RI)

**Figure 4. Geographical variability of COVID-19 time-delay adjusted CFR, pervert risk, infant mortality rate and cumulative morbidity rate across 17 geographic areas, Spain, 2 April 2020.**

Distribution of time-delay adjusted case fatality risks derived from the latest estimates (April 2, 2020) are presented. Top to b (A) time –delay adjusted case fatality rate as at April 2 2020 (B) poverty risk in 2017 (C) Infant mortality risk per 1000 birth in 2016 (D) cumulative morbidity rate as at April 2 2020.

Spain (National)

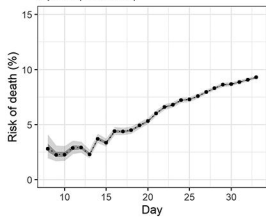

Andalucia (AN)

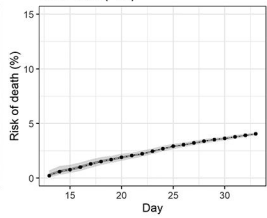

Aragon (AR)

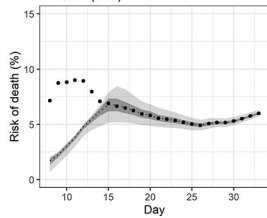

Asturias (AS)

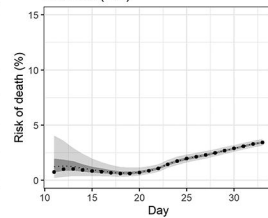

Balears (IB)

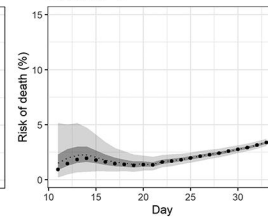

Canarias (CN)

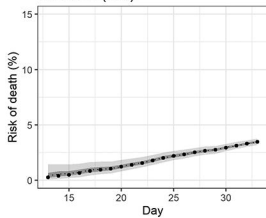

Cantabria (CB)

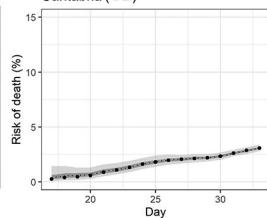

Castilla-La Mancha (CM)

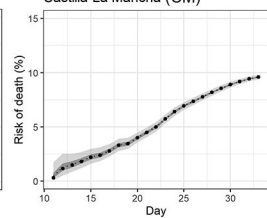

Castilla y Leon (CL)

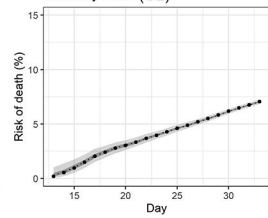

Catalunya (CT)

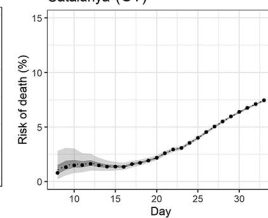

Ceuta (CE)

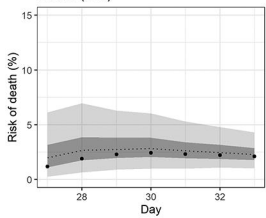

C.Valenciana (VC)

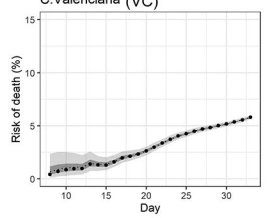

Extremadura (EX)

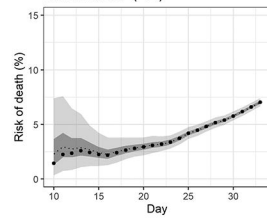

Galicia(GA)

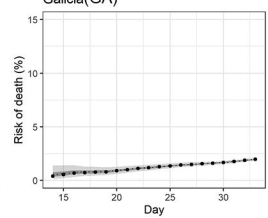

Madrid (MD)

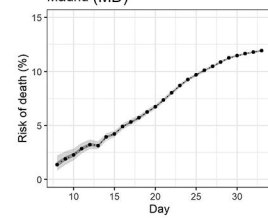

Melilla (ME)

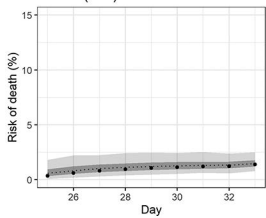

Murcia (MC)

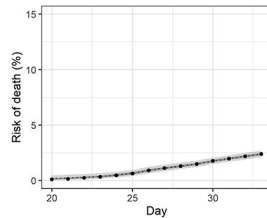

Navarra (NC)

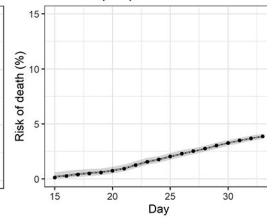

Pais Vasco (PV)

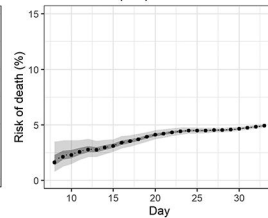

La Rioja (RI)

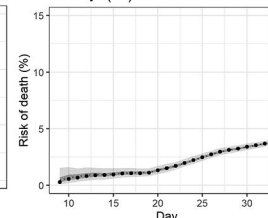

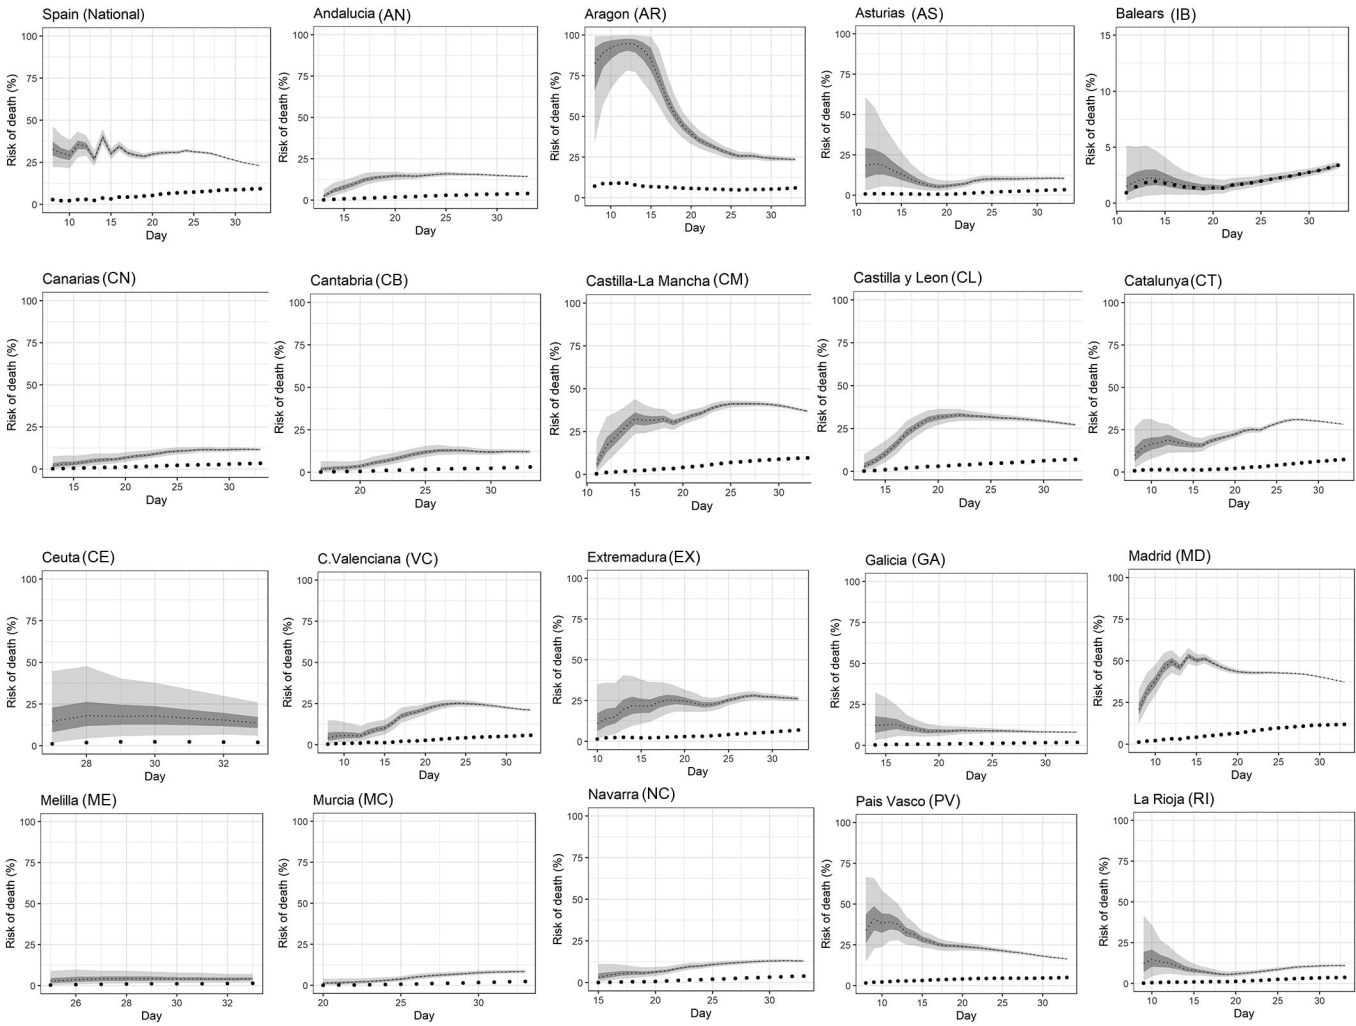

Time delay adjusted CFR by area  
The latest estimate

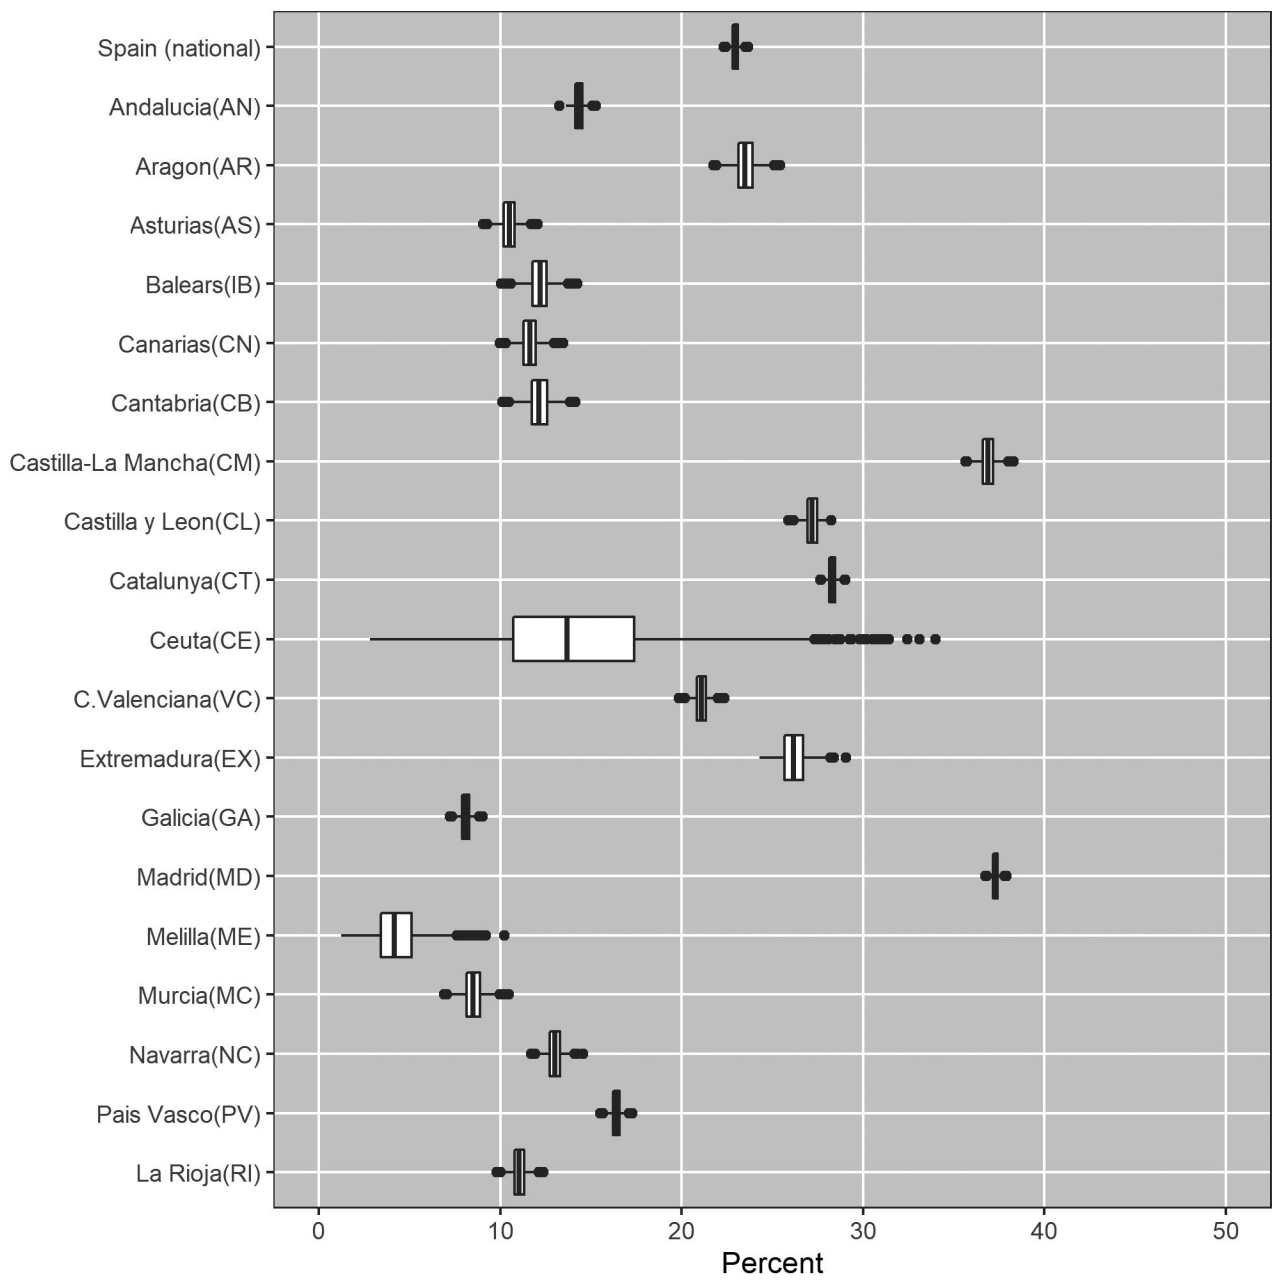

A

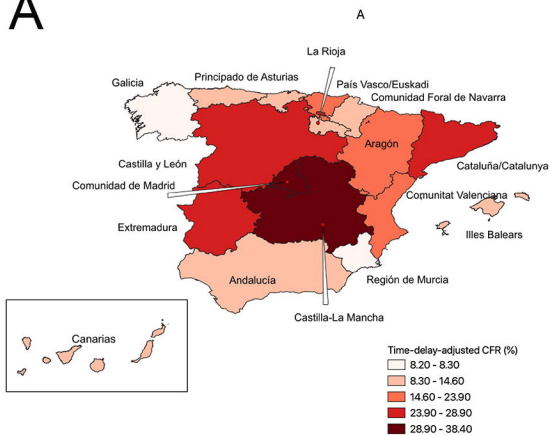

B

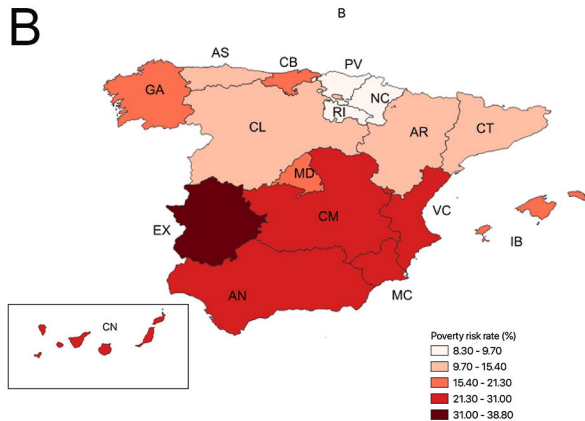

C

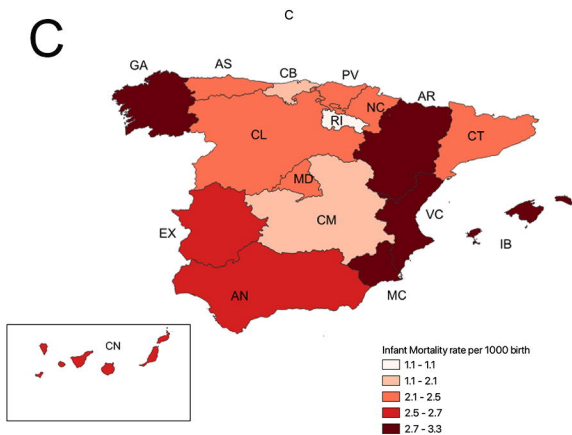

D

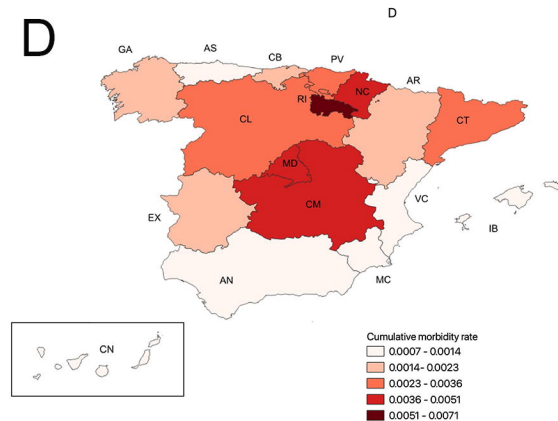

Source: https://www.medrxiv.org/content/10.1101/2020.04.14.20065524v1.full.pdf
